# Supplementary material for: Conserved and novel roles for the Gsh2 transcription factor in primary neurogenesis
Source: Oxford University Press journal article supplement (doi:10.1242/dev.047159), 2010-07-08
Supplement: dev047159tables1.pdf [file dev047159tables1.pdf]

**Table S1. RT-PCR primers**

| Gene          | Forward primer (5' to 3') | Reverse primer (5' to 3') |
|---------------|---------------------------|---------------------------|
| L8            | GGGCTRTCGACTTYGCTGAA      | ATACGACCACCCWCCAGCAAC     |
| <i>Dbx</i>    | AGACCCACCCCGACTCTGACG     | GGGCACCACCGAAGAGGAAGC     |
| <i>NeuroD</i> | CCAGACCTGGTGTCCTTTGT      | GGGATATAGTGGCTGCAGGA      |
| <i>Ngnr1</i>  | GCAGCTACACAGTCCGACAA      | GAAGGAGTCGCAAGAGTTGG      |
